# Supplementary material
Source: publisher figshare collection journal article supplement (https://karger.figshare.com/articles/dataset/_/8152652)
Supplement: Supplementary file 4 [file 1]

## **SUPPLEMENTARY FIGURE LEGENDS**

### **Supplementary Figure 1.** Protein markers of neuronal viability and cell death.

Western blotting showed similar expression of NeuN (A,  $p=0.210$ ,  $n=6$ ) and cleaved caspase-3 (B,  $p=0.206$ ,  $n=6$ ) among the treatment groups. Each circle represents one piglet. Analyses conducted by Friedman test with data blocked by gel. NormoT, sustained normothermia; HI, hypoxia-ischemia; HypoT, sustained hypothermia; Rewarm, hypothermia followed by rewarming.

**Supplementary Figure 2.** Proteins involved in the inflammasome. Western blotting showed similar expression of TNF $\alpha$  (A,  $p=0.255$ ,  $n=4$ ), CD95 (B,  $p=0.173$ ,  $n=4$ ), nitrotyrosine (C,  $p=0.849$ ,  $n=4$ ), and Iba1 (D,  $p=0.382$ ,  $n=4$ ) among the treatment groups. Each circle represents one piglet. Analyses conducted by Friedman test with data blocked by gel. NormoT, sustained normothermia; HI, hypoxia-ischemia; HypoT, sustained hypothermia; Rewarm, hypothermia followed by rewarming.

**Supplementary Figure 3.** Proteins involved in the unfolded protein response. Western blotting showed similar expression of HSP70 (A,  $p=0.448$ ,  $n=4$ ), ERN1 (B,  $p=0.549$ ,  $n=4$ ), PERK (C,  $p=0.243$ ,  $n=4$ ), and pERN1 (D,  $p=0.103$ ,  $n=4$ ) among the treatment groups. Each circle represents one piglet. Analyses conducted by Friedman test with data blocked by gel. NormoT, sustained normothermia; HI, hypoxia-ischemia; HypoT, sustained hypothermia; Rewarm, hypothermia followed by rewarming.
